# Supplementary material for: Weight control behaviors according to body weight status and accuracy of weight perceptions among Korean women: a nationwide population-based survey
Source: PubMed Central journal article supplement (PMC6591250; doi:10.1038/s41598-019-45596-z), 2019-06-24
Supplement: 41598_2019_45596_MOESM1_ESM.pdf [file 41598_2019_45596_MOESM1_ESM.pdf]

**Weight control behaviors according to body weight status and accuracy of weight perceptions among Korean women: a nationwide population-based survey**

Boyoung Park<sup>1</sup> <hayejine@hanmail.net>

Ha Na Cho<sup>2</sup> <hana@ncc.re.kr>

Eunji Choi<sup>2</sup> <eunji.choi@ncc.re.kr>

Da Hea Seo<sup>3</sup> <DAHEA@yuhs.ac>

Nam-Soon Kim<sup>4</sup> <artemine@kihasa.re.kr>

Eunja Park<sup>4</sup> <ejpark@kihasa.re.kr>

Sue Kim<sup>5</sup> <SUEKIM@yuhs.ac>

Yeong-Ran Park<sup>6</sup> <yeongranpark@daum.net>

Kui Son Choi<sup>2\*</sup> <kschoi@ncc.re.kr>

Yumie Rhee<sup>7\*</sup> <yumie@yuhs.ac>

<sup>1</sup>Department of Medicine, Hanyang University College of Medicine

<sup>2</sup>Department of Cancer Control and Population Health, Graduate School of Cancer Science and Policy, National Cancer Center

<sup>3</sup>Department of Endocrinology and Metabolism, School of Medicine, Inha University

<sup>4</sup>Health Care Policy Research Department, Korea Institute for Health and Social Affairs

<sup>5</sup>College of Nursing, Yonsei University

<sup>6</sup>Department of Silver Industry, Kangnam University

<sup>7</sup>Department of Internal Medicine, Endocrine Research Institute, Severance Hospital, Yonsei University College of Medicine

\*Corresponding author: KS Choi and Y Rhee contributed equally

Appendix Table 1. Distribution of covariates according to weight status according to weight lose behaviors (trying to lose weight)

| Characteristics                | Not trying to lose weight | Trying to lose weight | P-value |
|--------------------------------|---------------------------|-----------------------|---------|
|                                | (N=6073)                  | (N=2511)              |         |
| Age, mean (SD)                 | 54.5 ± 17.5               | 49.9 ± 16.6           | <0.001  |
| Age group, N (%)               |                           |                       |         |
| 19 -39                         | 1477 (24.3%)              | 752 (29.9%)           | <0.001  |
| 40-59                          | 1731 (28.5%)              | 933 (37.2%)           |         |
| 60-69                          | 1274 (21.0%)              | 463 (18.4%)           |         |
| 70-79                          | 1591 (26.2%)              | 363 (14.5%)           |         |
| Residential area, N (%)        |                           |                       |         |
| Urban                          | 4843 (79.7%)              | 1991 (79.3%)          | 0.655   |
| Rural                          | 1230 (20.3%)              | 520 (20.7%)           |         |
| Education, N (%)               |                           |                       |         |
| ≤Elementary school             | 1555 (25.6%)              | 328 (13.1%)           | <0.001  |
| Middle school                  | 905 (14.9%)               | 313 (12.5%)           |         |
| High school                    | 1834 (30.2%)              | 928 (37.0%)           |         |
| College or more                | 1779 (29.3%)              | 942 (37.5%)           |         |
| Marital status, N (%)          |                           |                       |         |
| Single                         | 877 (14.4%)               | 454 (18.1%)           | <0.001  |
| Cohabitant                     | 4100 (67.5%)              | 1784 (71.0%)          |         |
| Divorced or widow              | 1096 (18.0%)              | 273 (10.9%)           |         |
| Household income, N (%)        |                           |                       |         |
| <2,000\$/month                 | 1806 (29.7%)              | 478 (19.0%)           | <0.001  |
| 2,000-3,999\$/month            | 2384 (39.3%)              | 1066 (42.5%)          |         |
| ≥4,000\$/month                 | 1883 (31.0%)              | 967 (38.5%)           |         |
| Smoking, N (%)                 |                           |                       |         |
| Never                          | 5799 (95.5%)              | 2342 (93.3%)          | 0.012   |
| Ever                           | 274 ( 4.5%)               | 169 ( 6.7%)           |         |
| Drinking, N (%)                |                           |                       |         |
| Never                          | 1581 (26.0%)              | 411 (16.4%)           | 0.002   |
| Ever                           | 4492 (74.0%)              | 2100 (83.6%)          |         |
| Perceived health status, N (%) |                           |                       |         |
| Healthy                        | 3060 (50.4%)              | 1317 (52.4%)          | <0.001  |
| Normal                         | 1936 (31.9%)              | 901 (35.9%)           |         |
| Unhealthy                      | 1077 (17.7%)              | 293 (11.7%)           |         |

Appendix Table 2. Crude odds ratios of weight lose behaviors (trying to lose weight) according to weight status and weight perceptions among the participants

|                               | Trying to lose weight | Weight control behaviors among women who had tried to lose weight |                       |                    |                  |                  |
|-------------------------------|-----------------------|-------------------------------------------------------------------|-----------------------|--------------------|------------------|------------------|
|                               |                       | Exercise                                                          | Fasting/meal skipping | Dieting (ate less) | Diet pill        | One kind of food |
| Weight status <sup>1</sup>    |                       |                                                                   |                       |                    |                  |                  |
| Normal                        | 1 (Ref)               | 1 (Ref)                                                           | 1 (Ref)               | 1 (Ref)            | 1 (Ref)          | 1 (Ref)          |
| Overweight                    | 1.78 (1.59-2.00)      | 1.25 (1.04-1.51)                                                  | 0.73 (0.58-0.92)      | 1.18 (0.95-1.48)   | 0.94 (0.72-1.21) | 0.61 (0.43-0.86) |
| Obese                         | 2.38 (2.12-2.68)      | 1.23 (1.02-1.49)                                                  | 0.79 (0.62-0.98)      | 1.11 (0.89-1.39)   | 1.13 (0.88-1.46) | 0.56 (0.39-0.80) |
| Perceived weight <sup>2</sup> |                       |                                                                   |                       |                    |                  |                  |
| Underweight                   | 0.31 (0.23-0.42)      | 1.63 (0.89-3.07)                                                  | 1.70 (0.89-3.16)      | 0.47 (0.25-0.87)   | 1.50 (0.64-3.15) | 1.84 (0.73-4.01) |
| Right weight                  | 1 (Ref)               | 1 (Ref)                                                           | 1 (Ref)               | 1 (Ref)            | 1 (Ref)          | 1 (Ref)          |
| Overweight                    | 3.47 (3.13-3.86)      | 1.05 (0.89-1.25)                                                  | 0.77 (0.63-0.95)      | 1.29 (1.03-1.62)   | 1.37 (1.08-1.77) | 0.91 (0.68-1.24) |
| Obese                         | 6.04 (4.94-7.39)      | 1.52 (1.15-2.01)                                                  | 1.19 (0.87-1.62)      | 1.13 (0.80-1.61)   | 2.34 (1.66-3.29) | 0.72 (0.41-1.20) |

Appendix Table 3. Crude odds ratios of weight lose behaviors (trying to lose weight) according to weight status and accuracy of weight perceptions among the participants

|                     | Trying to lose weight | Weight control behaviors among women who had tried to lose weight |                       |                  |                  |                  |
|---------------------|-----------------------|-------------------------------------------------------------------|-----------------------|------------------|------------------|------------------|
|                     |                       | Exercise                                                          | Fasting/meal skipping | Diet (ate less)  | Diet pill        | One kind of food |
| <b>Normal</b>       |                       |                                                                   |                       |                  |                  |                  |
| Underassessment     | 0.29 (0.20-0.40)      | 1.64 (0.88-3.40)                                                  | 1.64 (0.82-3.18)      | 0.41 (0.22-0.80) | 1.33 (0.53-2.94) | 1.46 (0.54-3.36) |
| Accurate assessment | 1 (Ref)               | 1 (Ref)                                                           | 1 (Ref)               | 1 (Ref)          | 1 (Ref)          | 1 (Ref)          |
| Overassessment      | 3.85 (3.29-4.51)      | 1.11 (0.87-1.42)                                                  | 1.04 (0.78-1.38)      | 0.99 (0.75-1.32) | 1.47 (1.06-2.05) | 1.00 (0.67-1.48) |
| <b>Overweight</b>   |                       |                                                                   |                       |                  |                  |                  |
| Underassessment     | 0.27 (0.22-0.33)      | 1.09 (0.77-1.54)                                                  | 1.51 (0.98-2.28)      | 0.52 (0.35-0.76) | 0.52 (0.29-0.90) | 0.48 (0.19-1.03) |
| Accurate assessment | 1 (Ref)               | 1 (Ref)                                                           | 1 (Ref)               | 1 (Ref)          | 1 (Ref)          | 1 (Ref)          |
| Overassessment      | 1.46 (0.83-2.62)      | 1.12 (0.52-2.47)                                                  | 4.89 (2.23-10.70)     | 0.74 (0.32-1.91) | 2.07 (0.83-4.69) | 0.88 (0.14-3.10) |
| <b>Obese</b>        |                       |                                                                   |                       |                  |                  |                  |
| Underassessment     | 0.24 (0.17-0.33)      | 1.54 (0.85-2.84)                                                  | 1.35 (0.67-2.54)      | 0.65 (0.36-1.24) | 0.50 (0.17-1.17) | 0.91 (0.22-2.63) |
| Accurate assessment | 1 (Ref)               | 1 (Ref)                                                           | 1 (Ref)               | 1 (Ref)          | 1 (Ref)          | 1 (Ref)          |
